# Supplementary material for: N6-methyladenosine (m6A) writer METTL3 accelerates the apoptosis of vascular endothelial cells in high glucose
Source: Research Square preprint supplement (doi:10.21203/rs.3.rs-1981358/v1), 2022-08-23
Supplement: Supplementary file 1 [file 70ec430f68651160b09f012e.docx]

**Table S1**. Primers sequences for qRT-PCR and sequences of shRNA.

|  | Sequences |
| --- | --- |
| METTL3 | forward, 5’- TTGTCTCCAACCTTCCGTAGT-3’  reverse, 5’-CCAGATCAGAGAGGTGGTGTAG-3’ |
| SOCS3 | forward, 5’- CCTGCGCCTCAAGACCTTC-3’  reverse, 5’- GTCACTGCGCTCCAGTAGAA-3’ |
| sh-METTL3-1 | 5’- CCTCAGTGGATCTGTTGTGAT-3’ |
| sh-METTL3-2 | 5’- CGTCAGTATCTTGGGCAAATT-3’ |
| sh-METTL3-3 | 5’-GCACCCGCAAGATTGAGTTAT-3’ |
| GAPDH | forward, 5’- GGAGCGAGATCCCTCCAAAAT-3’  reverse, 5’- GGCTGTTGTCATACTTCTCATGG -3’ |
